# Supplementary material for: Gene Expression Profiling in a Mouse Model Identifies Fetal Liver- and Placenta-Derived Potential Biomarkers for Down Syndrome Screening
Source: PLoS One. 2011 Apr 14;6(4):e18866. doi: 10.1371/journal.pone.0018866 (PMC3077415; doi:10.1371/journal.pone.0018866)
Supplement: Dataset S3 — Regulated genes for fetal liver and placenta (Microsoft Excel document). (XLS) [file pone.0018866.s003.xls]

## Sheet: Regulated genes
Fetal liver						Placenta
Gene symbol	Ratio	Chromosome	Blood detectable			Gene symbol	Ratio	Chromosome	Blood detectable
Induced in Ts1Cje mice (at DS locus)						Induced in Ts1Cje mice (at DS locus)
1110004E09Rik	1.27154	16	no			1110004E09Rik	1.24671	16	no
1810007M14Rik	1.35374	16	no			1810007M14Rik	1.33229	16	no
2610039C10Rik	1.3644	16	no			2610039C10Rik	1.30848	16	no
A630089N07Rik	1.50589	16	no			Atp5o	1.39072	16	no
Atp5o	1.5884	16	no			Brwd1	1.30568	16	no
Bace2	1.20918	16	no			C2cd2	1.37022	16	yes
Brwd1	1.30491	16	no			Cbr1	1.28188	16	no
C2cd2	1.17324	16	yes			Cryzl1	1.32621	16	no
Cbr1	1.33462	16	no			Donson	1.29475	16	no
Chaf1b	1.25162	16	no			Dopey2	1.26426	16	no
Cryzl1	1.39775	16	no			Dscr3	1.36485	16	no
Dnajc28	1.20667	16	no			Dyrk1a	1.28222	16	yes
Donson	1.29789	16	no			Ets2	1.42517	16	no
Dopey2	1.32123	16	no			Fam165b	1.31621	16	no
Dscr3	1.40909	16	no			Gart	1.29355	16	no
Dyrk1a	1.28993	16	yes			Gm5436	1.3422	16	no
Ets2	1.4346	16	no			Gm8566	1.62249	16	no
Fam165b	1.33711	16	no			Gm9001	1.32045	16	no
Gart	1.35548	16	no			Hlcs	1.34877	16	no
Gm5436	1.44915	16	no			Hmgn1	1.37871	16	no
Gm8566	1.43197	16	no			Ifnar1	1.35295	16	no
Gm9001	1.44975	16	no			Ifnar2	1.3755	16	yes
Hlcs	1.27871	16	no			Ifngr2	1.31722	16	no
Hmgn1	1.55711	16	no			Il10rb	1.50556	16	no
Ifnar1	1.38406	16	no			Itsn1	1.31467	16	no
Ifnar2	1.52521	16	yes			Morc3	1.34046	16	yes
Ifngr2	1.30089	16	no			Mrps6	1.39187	16	no
Igsf5	1.31301	16	no			Mx2	1.34644	16	no
Il10rb	1.4713	16	no			Pigp	1.2996	16	no
Itgb2l	1.7696	16	no			Psmg1	1.43214	16	no
Itsn1	1.36425	16	no			Rcan1	1.32475	16	no
Morc3	1.37197	16	yes			Ripk4	1.41613	16	no
Mrap	1.44352	16	no			Setd4	1.25617	16	no
Mrps6	1.34988	16	no			Sfrs15	1.18484	16	yes
Pigp	1.33963	16	no			Sod1	1.88126	16	yes
Prdm15	1.21252	16	no			Son	1.60859	16	no
Psmg1	1.55786	16	no			Synj1	1.17997	16	no
Rcan1	1.31526	16	no			Tmem50b	1.30294	16	no
Ripk4	1.36497	16	no			Tmprss2	1.51436	16	yes
Ripply3	1.16945	16	no			Ttc3	1.27864	16	no
Runx1	1.21554	16	no			Wrb	1.37757	16	no
Setd4	1.18318	16	no			Induced in Ts1Cje mice (outside DS locus)
Sfrs15	1.16596	16	yes			Bst2	1.18591	8	no
Sod1	1.7957	16	yes			Fgfbp3	1.17841	19	yes
Son	1.66559	16	no			I1C0022H11Rik	1.3072	7	no
Synj1	1.38998	16	no			Ifi27l1	1.2355	12	no
Tmem50b	1.42783	16	no			Igtp	1.33617	11	no
Tmprss2	1.6288	16	yes			Parp10	1.21959	15	no
Ttc3	1.29909	16	no			Suppressed in Ts1Cje mice
Urb1	1.27008	16	no			Sp4	-1.3209	12	no
Wrb	1.44252	16	no
Induced in Ts1Cje mice (outside DS locus)
2200002D01Rik	1.23308	7	no
A930006K02Rik	1.28272	16	no
AA467197	1.32343	2	no
Adrb3	1.12211	8	no
Akr1c18	1.27343	13	no
Alox5	1.15311	6	no
Anxa1	1.4338	19	no
BC117090	1.43187	16	no
Camp	1.72437	9	yes
Cpm	1.25039	10	no
Cyp2e1	1.51067	7	no
Dpp4	1.17833	2	yes
F2rl1	1.08196	13	no
Fpr2	1.47799	17	no
Gp49a	1.17938	10	no
Hook2	1.17195	8	no
Ifi27l1	1.78569	12	no
Ifitm6	1.26943	7	no
Il28ra	1.23746	4	no
Irf7	1.41659	7	no
Irf9	1.37596	14	no
Isg15	1.94748	4	yes
Lcn2	1.48648	2	yes
Lifr	1.23778	15	yes
Ltf	1.98143	9	yes
Lyz1	1.26473	10	no
Lyz2	1.39501	10	no
Mmp8	1.53239	9	yes
Mmp9	1.46873	2	yes
Ngp	1.94559	9	no
Olfm4	1.89464	14	yes
Padi4	1.21445	4	no
Pglyrp1	1.12404	7	yes
Pnliprp2	1.34534	19	yes
Prss34	1.26314	17	no
Retnlg	1.6454	16	no
S100a8	1.76934	3	yes
S100a9	1.9221	3	yes
Samd9l	1.26749	6	no
Slfn4	1.86753	11	no
Stfa2l1	1.89161	16	no
Stfa3	2.26448	16	no
Trem3	1.27354	17	no
Ugp2	1.20721	11	no
Suppressed in Ts1Cje mice
Ccl24	-1.22058	5	yes
Gnaz	-1.35555	10	no
Hbb-bh1	-1.60276	7	no
Nuf2	-1.22426	1	no
Pf4	-1.25857	5	yes
Plek	-1.34649	11	yes
Ppbp	-1.3364	5	yes
Rab27b	-1.21149	18	no
Rgs18	-1.35838	1	no
Siva1	-1.15308	12	no
Sp4	-1.82571	12	no
Syce2	-1.16213	8	no
Tbxas1	-1.24577	6	no
Treml1	-1.49038	17	no
